# Supplementary material for: Exposure to Polybrominated Diphenyl Ethers and a Polybrominated Biphenyl and Risk of Thyroid Cancer in Women: Single and Multi-Pollutant Approaches
Source: Oxford University Press journal article supplement (doi:10.1158/1055-9965.epi-19-0526), 2019-08-06
Supplement: 10559965epi190526-sup-219544_2_supp_5639699_ptg5dw.docx [file 10559965epi190526-sup-219544_2_supp_5639699_ptg5dw.docx]

Supplemental Table S1. Spearman correlation coefficients for polybrominated diphenyl ether (PBDE) and polybrominated biphenyl (PBB) congeners.

|  | PBB153 | PBDE17 | PBDE28 | PBDE47 | PBDE85 | PBDE99 | PBDE100 | PBDE153 | PBDE154 | PBDE183 | PBDE209 |
| --- | --- | --- | --- | --- | --- | --- | --- | --- | --- | --- | --- |
| PBB153 | 1.000 |  |  |  |  |  |  |  |  |  |  |
| PBDE17 | -0.048 | 1.000 |  |  |  |  |  |  |  |  |  |
| PBDE28 | 0.034 | 0.127 | 1.000 |  |  |  |  |  |  |  |  |
| PBDE47 | 0.056 | 0.103 | 0.918 | 1.000 |  |  |  |  |  |  |  |
| PBDE85 | 0.056 | 0.129 | 0.555 | 0.585 | 1.000 |  |  |  |  |  |  |
| PBDE99 | 0.052 | 0.103 | 0.827 | 0.945 | 0.616 | 1.000 |  |  |  |  |  |
| PBDE100 | 0.051 | 0.099 | 0.843 | 0.917 | 0.563 | 0.877 | 1.000 |  |  |  |  |
| PBDE153 | 0.154 | 0.059 | 0.369 | 0.382 | 0.212 | 0.384 | 0.555 | 1.000 |  |  |  |
| PBDE154 | 0.089 | 0.118 | 0.592 | 0.629 | 0.584 | 0.634 | 0.653 | 0.334 | 1.000 |  |  |
| PBDE183 | 0.027 | 0.015 | 0.196 | 0.195 | 0.217 | 0.195 | 0.220 | 0.106 | 0.224 | 1.000 |  |
| PBDE209 | -0.009 | -0.041 | -0.087 | -0.052 | 0.026 | -0.038 | -0.069 | 0.029 | -0.023 | 0.117 | 1.000 |
